# Supplementary material
Source: PubMed Central journal article supplement (PMC1783125)

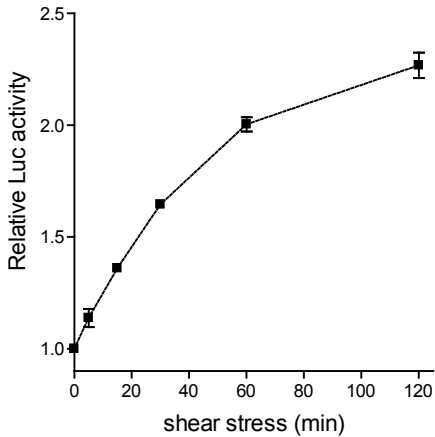

Supplement: pnas_0607296104_1.pdf [file pnas_0607296104_1.pdf]

**Fold induction of *Cyp1a1* mRNA  
(sheared vs. static serum)**

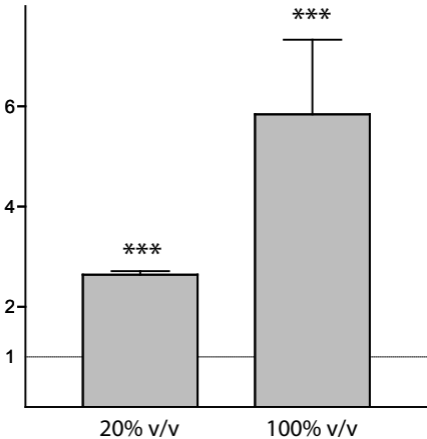

Supplement: pnas_0607296104_2.pdf [file pnas_0607296104_2.pdf]

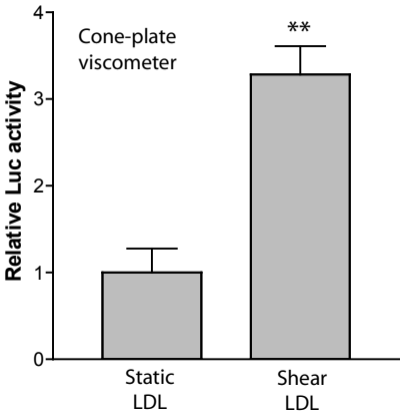

Supplement: pnas_0607296104_3.pdf [file pnas_0607296104_3.pdf]
